# Supplementary material
Source: Springer Nature journal article supplement (https://www.springermedizin.de/resource/supplementary/13058_2012_3150_MOESM15_ESM.pdf/9703386)
Supplement: MOESM15 [file 9703386]

**A**

Human Invasion Signature (HIS)  
NKI295 cohort

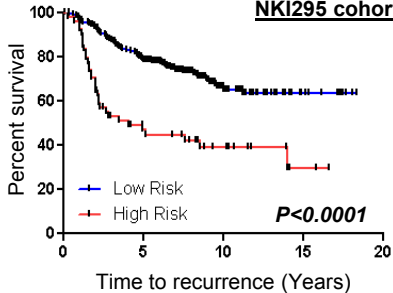

NKI-70-gene Signature  
NKI295 cohort

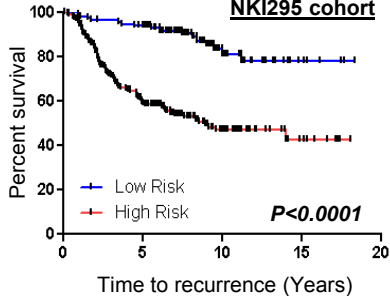**B**

**NKI295 cohort**

| Parameter | HR   | 95% CI    | p-value      |
|-----------|------|-----------|--------------|
| ER status | 1.29 | 0.75-2.21 | 0.352        |
| Grade     | 1.07 | 0.77-1.54 | 0.710        |
| Size      | 1.96 | 1.23-3.19 | 0.005        |
| Nodes     | 0.72 | 0.47-1.12 | 0.144        |
| NKI-70    | 4.00 | 2.04-7.87 | 0.000        |
| HIS       | 1.77 | 1.03-3.02 | <b>0.038</b> |
